# Supplementary material
Source: publisher site journal article supplement (https://static.cambridge.org/content/id/urn:cambridge.org:id:article:S001675682000028X/resource/name/S001675682000028Xsupp001.docx)
Supplement: Supplementary file 1 [file S001675682000028Xsupp001.docx]

**Supplementary video S1:** Rotating µ-CT model for *Haplotaeniatum albaensis* sp. nov. from the Hawkwood Burn, Crawford Group, Southern Uplands terrane, Scotland.

Link to download/view:

<https://drive.google.com/open?id=1CA4QlGYdr1HYluScOrxbiJlJjKF4Vyxm>
